# Supplementary material
Source: PubMed Central journal article supplement (PMC6597392)
Supplement: JB.00081-19Figures.pdf [file JB.00081-19Figures.pdf]

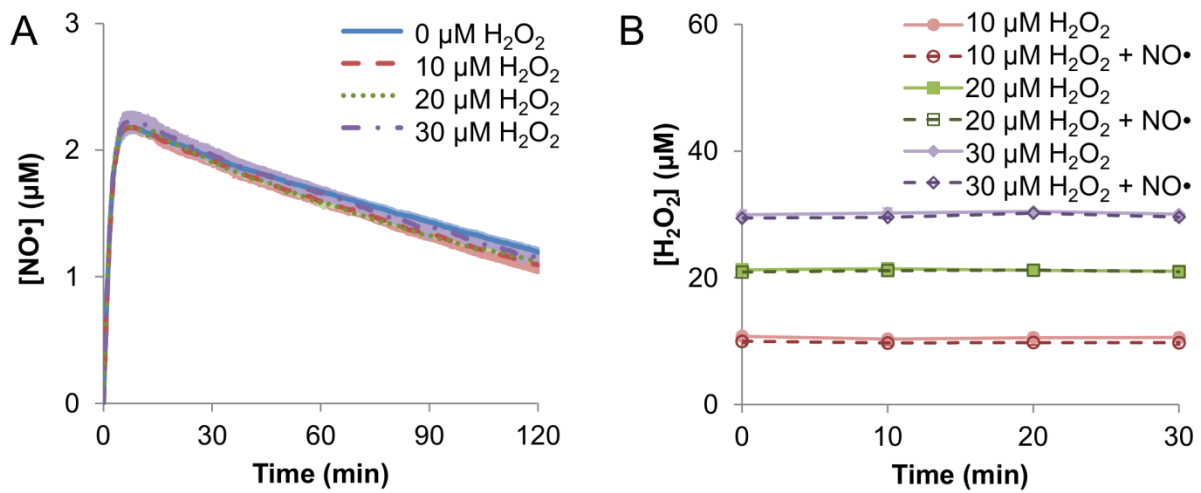

**Fig. S1. Cell-free  $\text{NO}\cdot$  and  $\text{H}_2\text{O}_2$  controls.**  $\text{NO}\cdot$  (A) and  $\text{H}_2\text{O}_2$  (B) consumption assays were performed in M9 media with 10 mM glucose lacking cells to account for any interactions between  $\text{NO}\cdot$  and  $\text{H}_2\text{O}_2$ . The  $\text{NO}\cdot$  curves did not differ in response to any  $\text{H}_2\text{O}_2$  concentration, and  $\text{H}_2\text{O}_2$  degradation was not affected in the presence of  $\text{NO}\cdot$ . Darker lines ( $\text{NO}\cdot$ ) and solid dots ( $\text{H}_2\text{O}_2$ ) are the means from at least three biological replicates, and the shaded regions around the darker lines and error bars show the standard error of the mean from those replicates.

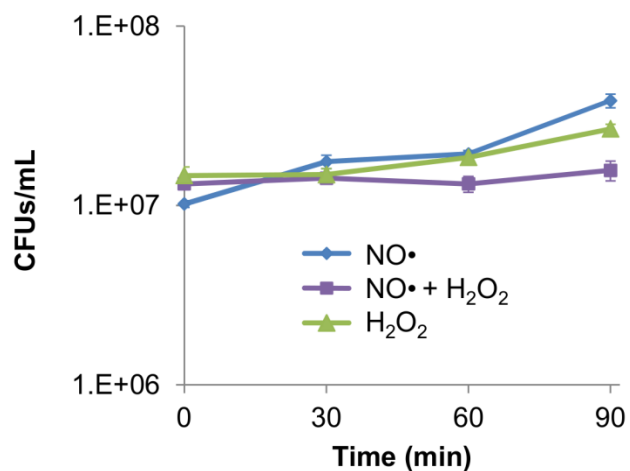

**Fig. S2. Culturability during NO• and/or H<sub>2</sub>O<sub>2</sub> treatment.** Exponentially-growing cells were inoculated into a bioreactor containing M9 media with 10 mM glucose. At t=0, a sample was taken prior to the addition of 0 or 30 μM H<sub>2</sub>O<sub>2</sub>, followed by 50 μM DPTA or an equivalent amount of the DPTA solvent. Under no condition was there a significant decrease in CFUs/mL. Data represents the average of at least three biological replicates, with error bars showing the standard error of the mean.

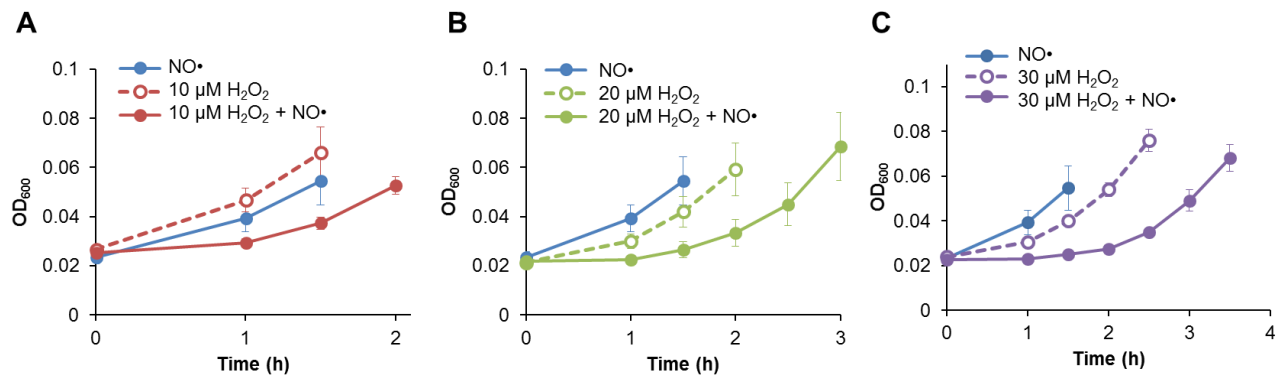

**Fig. S3. Re-growth following NO• and/or H<sub>2</sub>O<sub>2</sub> treatment.** OD<sub>600</sub> was monitored following treatment with 50 μM DPTA and/or H<sub>2</sub>O<sub>2</sub>. All samples resumed growth following treatment, after the clearance of both NO• and H<sub>2</sub>O<sub>2</sub>. Data represents the average of at least three biological replicates, with error bars showing the standard error of the mean.

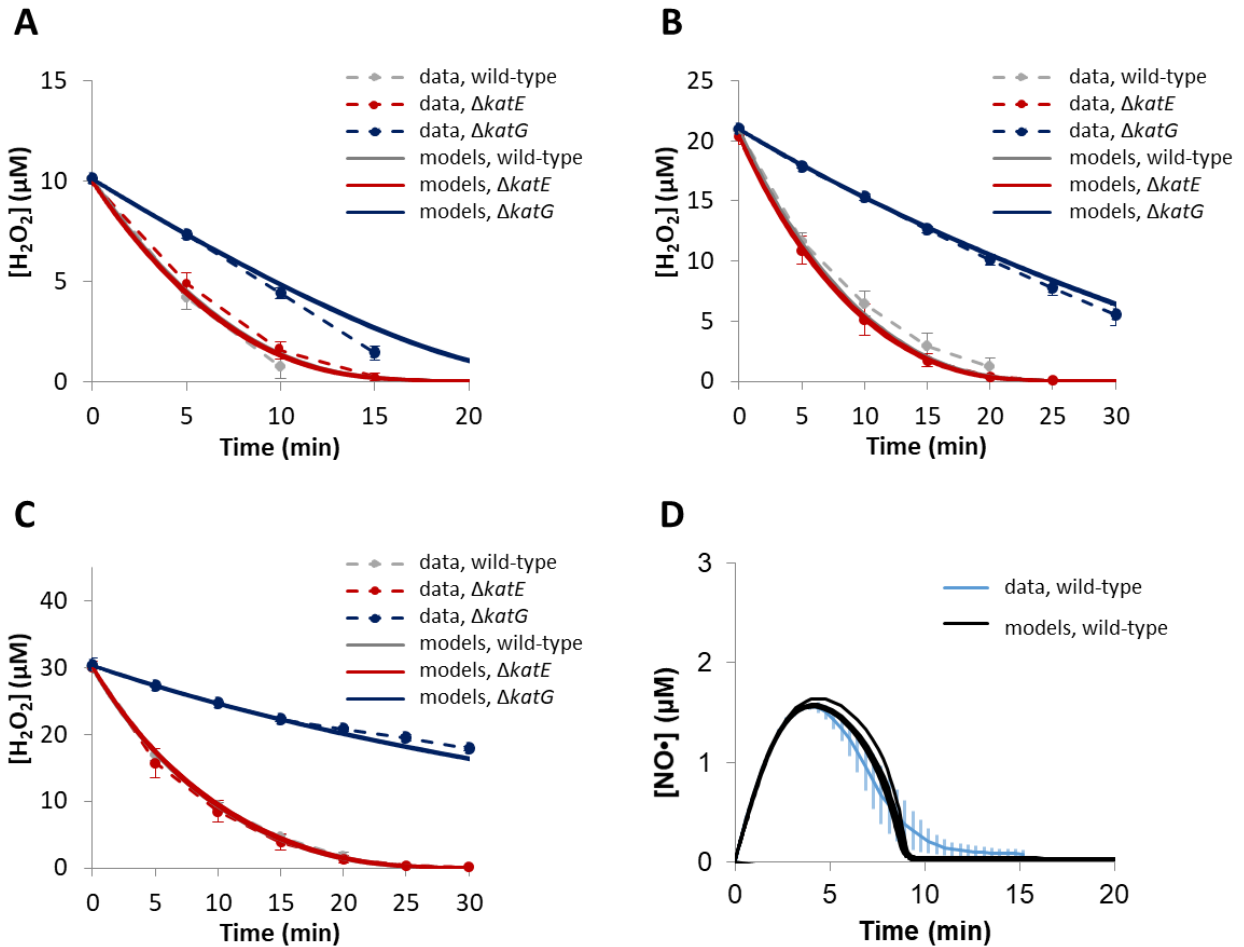

**Fig. S4. Simulation and experimental results under various  $\text{H}_2\text{O}_2$  and  $\text{NO}\cdot$  stress**

**conditions.** Simulated and observed  $\text{H}_2\text{O}_2$  clearance profiles of wild-type,  $\Delta katE$ , and  $\Delta katG$

when 10  $\mu\text{M}$   $\text{H}_2\text{O}_2$  (A), 20  $\mu\text{M}$   $\text{H}_2\text{O}_2$  (B) or 30  $\mu\text{M}$   $\text{H}_2\text{O}_2$  (C) was added at  $t = 0$  min. (D)

Simulated and observed wild-type  $\text{NO}\cdot$  clearance profiles after treatment of 50  $\mu\text{M}$  DPTA at  $t =$

0 min. For simulation data, all models with  $\text{ER} < 10$  were used to predict cellular responses. For

experimental data, the solid lines and solid dots are the means from at least three biological

replicates, and the shaded regions around the solid lines and error bars show the standard error of

the mean from those replicates.

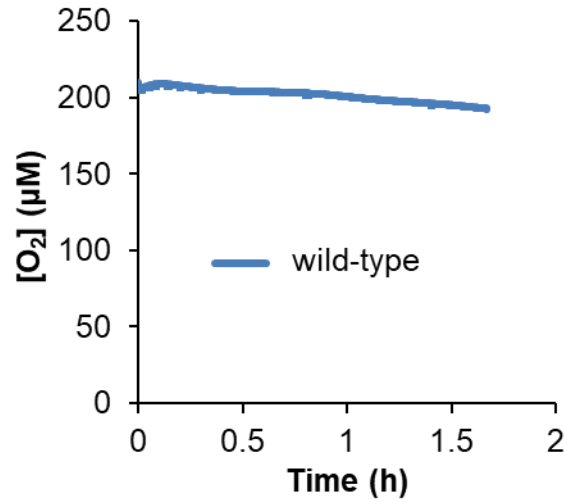

**Fig. S5. Oxygen concentration in the bioreactor following NO• and H<sub>2</sub>O<sub>2</sub> treatment.**

Exponentially-growing wild-type cells were treated with 30 µM H<sub>2</sub>O<sub>2</sub> and 50 µM DPTA in the bioreactor. O<sub>2</sub> concentration in the bioreactor was continuously monitored using an O<sub>2</sub> probe.

The solid line represents the averages of three biological replicates, with shaded regions around the solid line showing the standard error of the mean.

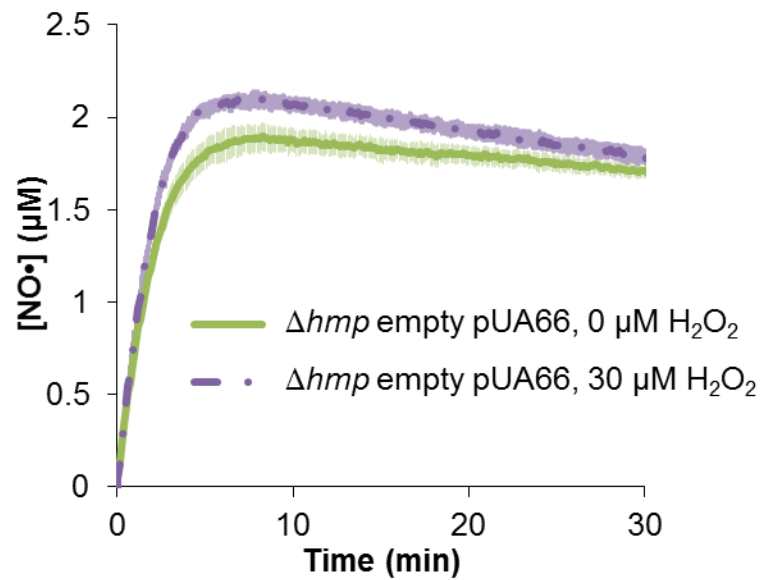

**Fig. S6. pUA66 did not affect the phenotype of  $\Delta hmp$ .** The inclusion of an empty pUA66 plasmid did not alter the NO• detoxifying capability of  $\Delta hmp$ . Detoxification of NO• was still not observed, regardless of the presence of  $H_2O_2$ . The darker lines represent the means of 3 independent replicates, and the shaded regions around the darker lines the standard errors of the means.

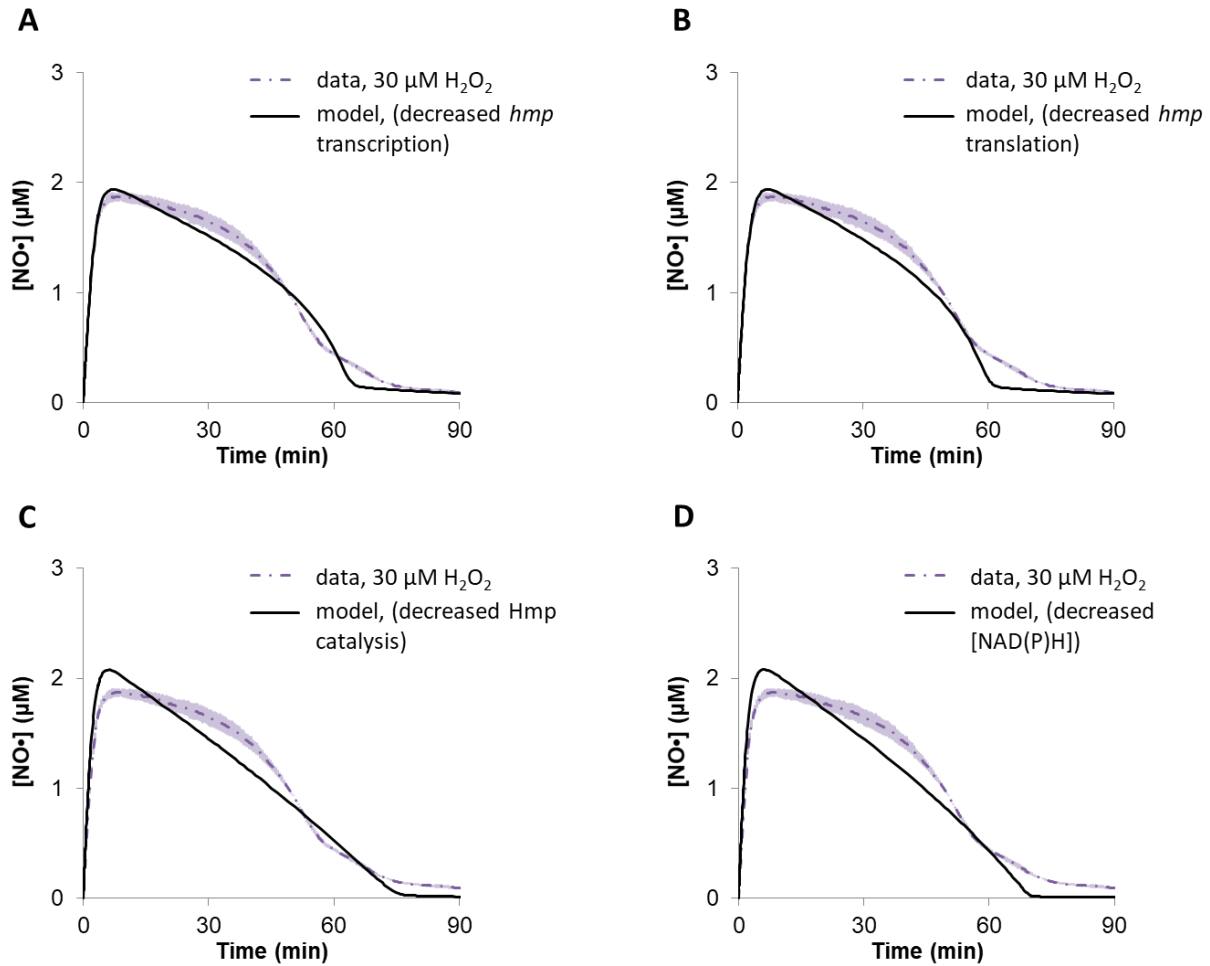

**Fig. S7. Simulations depict modes of how H<sub>2</sub>O<sub>2</sub> could interfere with NO• detoxification.**

Parameters in the best fit model were individually altered to capture the delay in NO• clearance under concurrent exposure to NO• and H<sub>2</sub>O<sub>2</sub>. The rate of *hmp* transcription ( $p\_HMPtranscr\_kmax$ ) was reduced in (A), the rate of Hmp translation ( $p\_HMPtranslate\_k$ ) was decreased in (B), the catalytic activity of Hmp ( $p\_HMP\_kP$ ) was reduced in (C), and the concentrations of NADPH and NADH were dropped in (D). The dashed line show the averages of three independent replicates, and the shaded region around the dashed line represents the standard error of the mean.

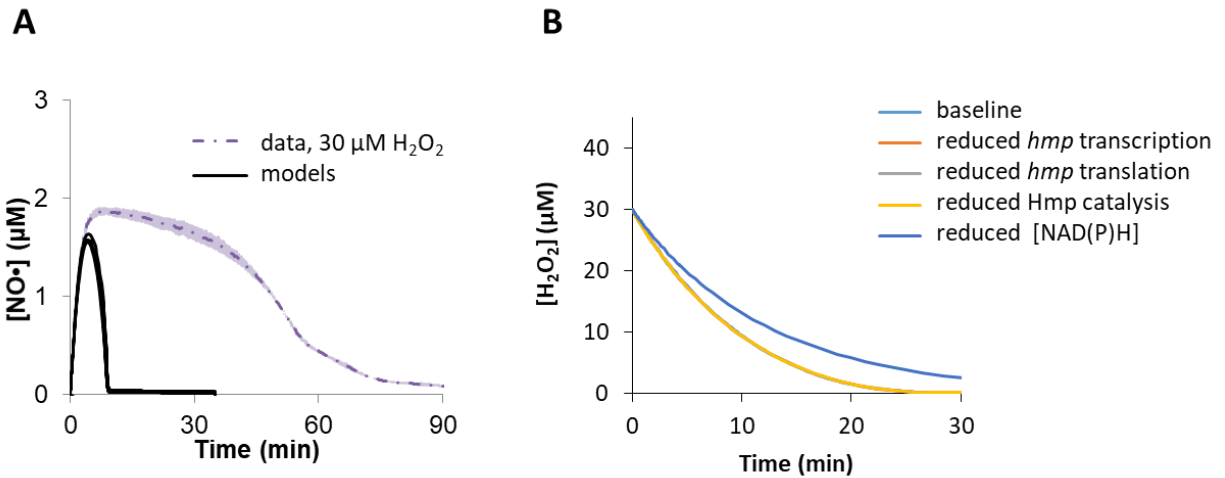

**Fig. S8. Simulation results under simultaneous stress.** (A) The ensemble of models was not able to capture the delay in  $\text{NO}\cdot$  clearance driven by the concurrent treatment of  $30\ \mu\text{M}\ \text{H}_2\text{O}_2$ . For the experimental data, the dashed line shows the average of 3 biological replicates, and the shading the accompanying standard errors. (B) The alterations of parameter values in the best-fit model that were able to recapitulate  $\text{NO}\cdot$  data from co-treatment conditions (Fig. S7). Here, the predictions of  $\text{H}_2\text{O}_2$  clearance by those models are plotted. Notably, the decrease in  $[\text{NAD(P)H}]$  resulted in a delayed  $\text{H}_2\text{O}_2$  clearance, which is inconsistent with observed experimental data.



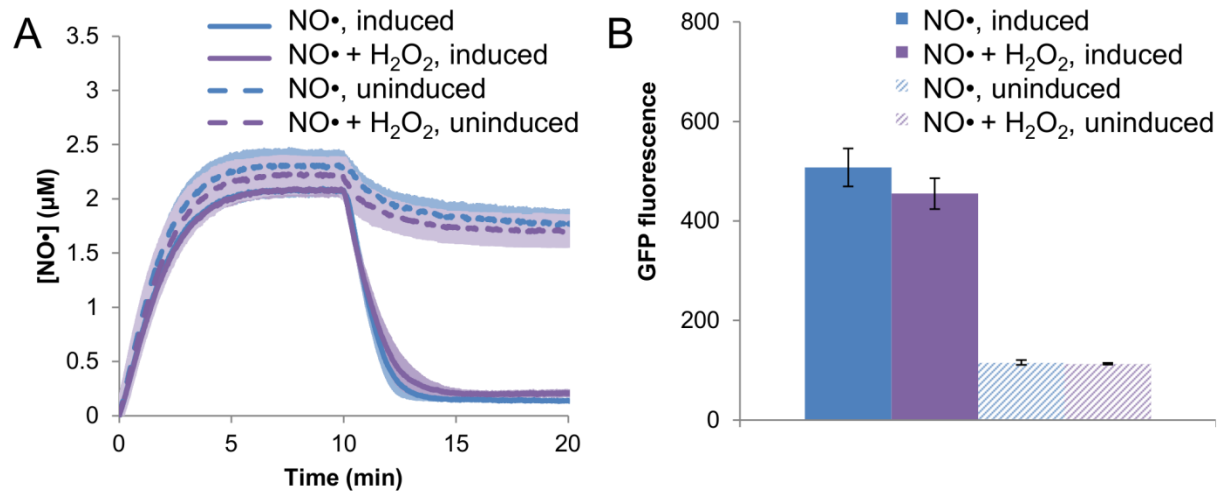

**Fig. S9. Uninduced controls for catalytic activity assay.** To account for leak from the plasmid, the experiment shown in Fig. 5 was repeated without inducer. The background expression level allows for a minimal amount of NO• detoxification (**A**). Dashed lines show the uninduced controls, whereas solid lines show the induced samples (from Fig. 5) and are included for reference. GFP levels associated with induced (solid bars) and uninduced (dashed bars) are shown in (**B**). Both panels show the average of three biological replicates, where error bars represent the standard error of the mean.

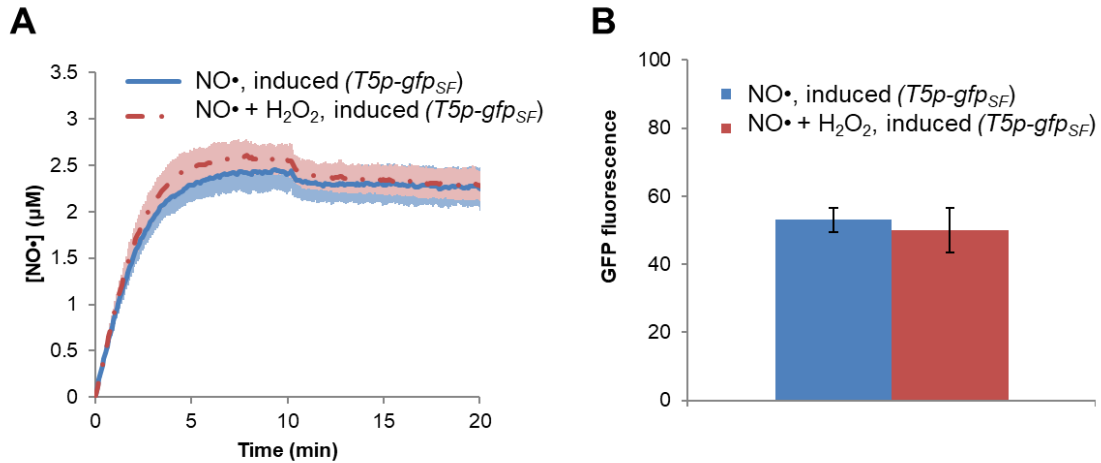

**Fig. S10. Induced controls for catalytic activity assay.** To account for presence of  $\text{GFP}_{SF}$  and IPTG, the experiment shown in Fig. 5 was repeated by inducing the expression  $\text{GFP}_{SF}$  from the same inducible promoter with the same concentration of IPTG, in a  $\Delta hmp$  strain. The difference between the plasmid used here and that used in Fig. 5 is the absence of *hmp*; the one here expresses GFP whereas that portrayed in Fig. 5 and S9 express an  $\Phi(\text{Hmp-GFP})$  translational fusion protein.  $\text{NO}\cdot$  clearance capability of this strain was unaffected by the presence of  $\text{H}_2\text{O}_2$ . GFP levels are shown in (B). Both panels show the average of three biological replicates, where error bars represent the standard error of the mean.

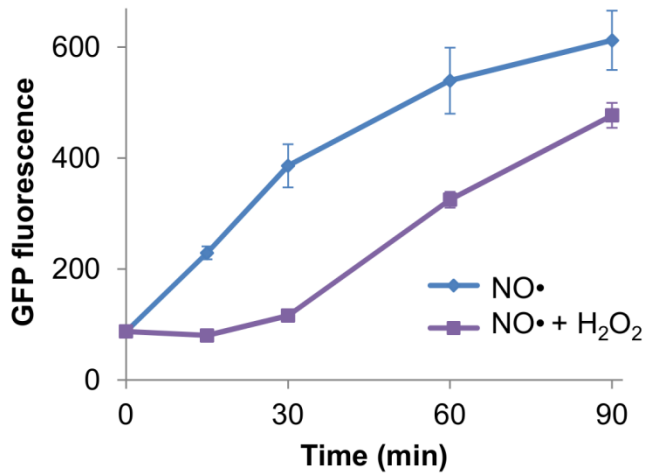

**Fig. S11. Expression from *hmp* promoter is regained after H<sub>2</sub>O<sub>2</sub> clearance.** At longer time scales than those shown in Fig. 6 (t=60 and 90 min), measurable GFP synthesis under the control of the *hmp* promoter is observed. H<sub>2</sub>O<sub>2</sub> is cleared at ~25 min. Time 0, 15 min, and 30 min (from Fig. 6) are shown for reference.

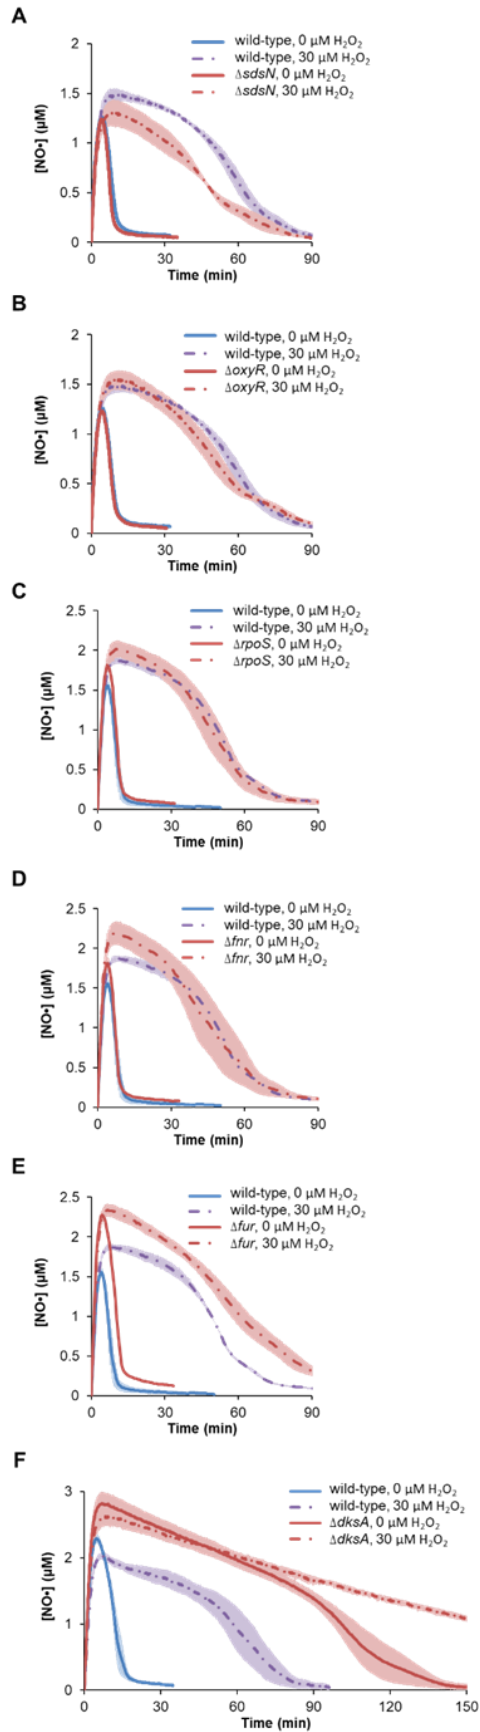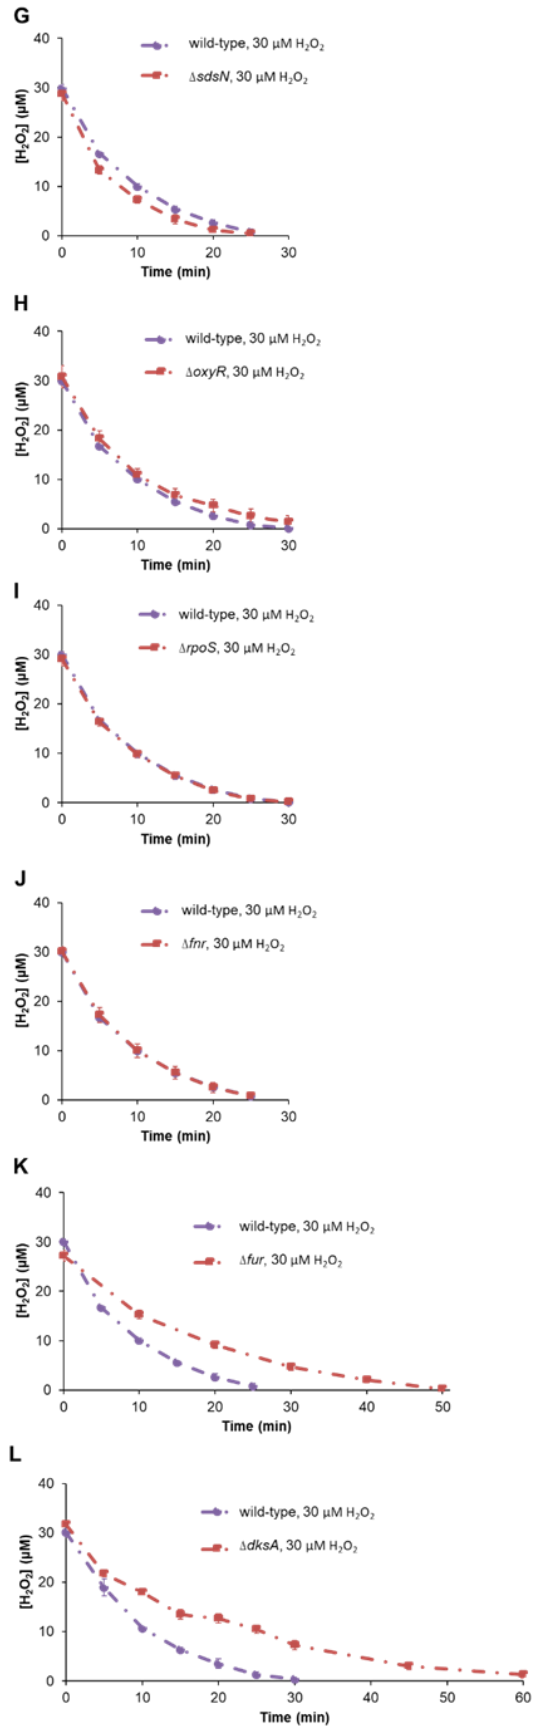

**Fig. S12. NO• and H<sub>2</sub>O<sub>2</sub> clearance profiles in mutants known to influence *hmp* and/or *katG* transcription.** Exponentially-growing  $\Delta sdsN$ ,  $\Delta oxyR$ ,  $\Delta rpoS$ ,  $\Delta fnr$ ,  $\Delta fur$ , and  $\Delta dksA$  cells were inoculated into a bioreactor containing 0 or 30  $\mu\text{M}$  H<sub>2</sub>O<sub>2</sub> in the bioreactor. The culture was then immediately treated with 50  $\mu\text{M}$  DPTA. NO• (**A-F**) was monitored continuously, whereas H<sub>2</sub>O<sub>2</sub> concentration (**G-L**) was quantified every 5 min, 10 min or 15 min depending on the clearance time of H<sub>2</sub>O<sub>2</sub>. In **F** and **L**, because  $\Delta dksA$  requires amino acid supplementation, wild-type was grown and stressed in M9 minAA to maintain consistency. Error bars show the standard error of the mean from three biological replicates.

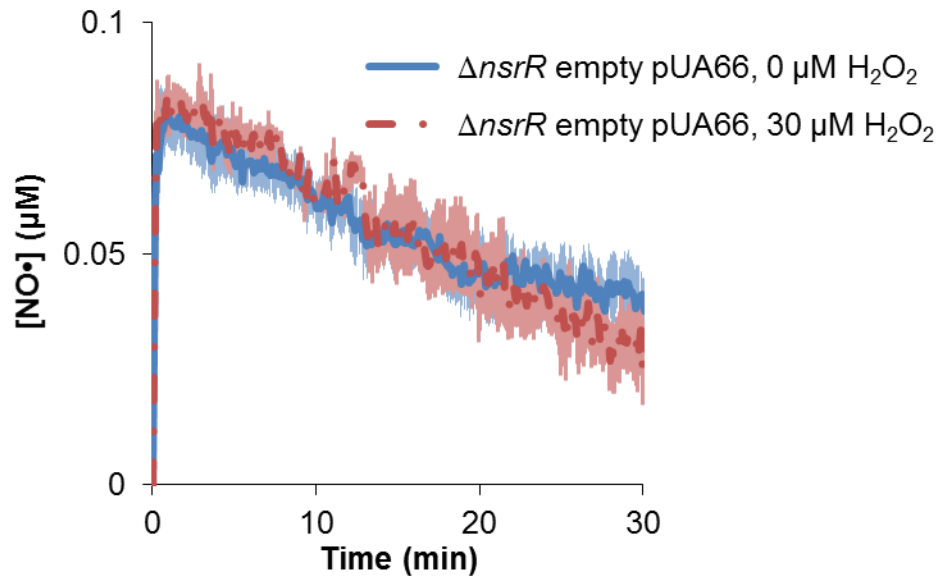

**Fig. S13. pUA66 did not affect the phenotype of  $\Delta nsrR$ .** The inclusion of an empty pUA66 plasmid did not alter the  $\text{NO}\cdot$  detoxifying capability of  $\Delta nsrR$ . There was simultaneous clearance of  $\text{NO}\cdot$  by cells regardless of the presence of  $\text{H}_2\text{O}_2$ , potentially due to constitutive expression of *hmp* in the absence of a functional NsrR. The darker lines represent the means of three independent replicates, and the shaded regions around the darker lines the standard errors of the means.

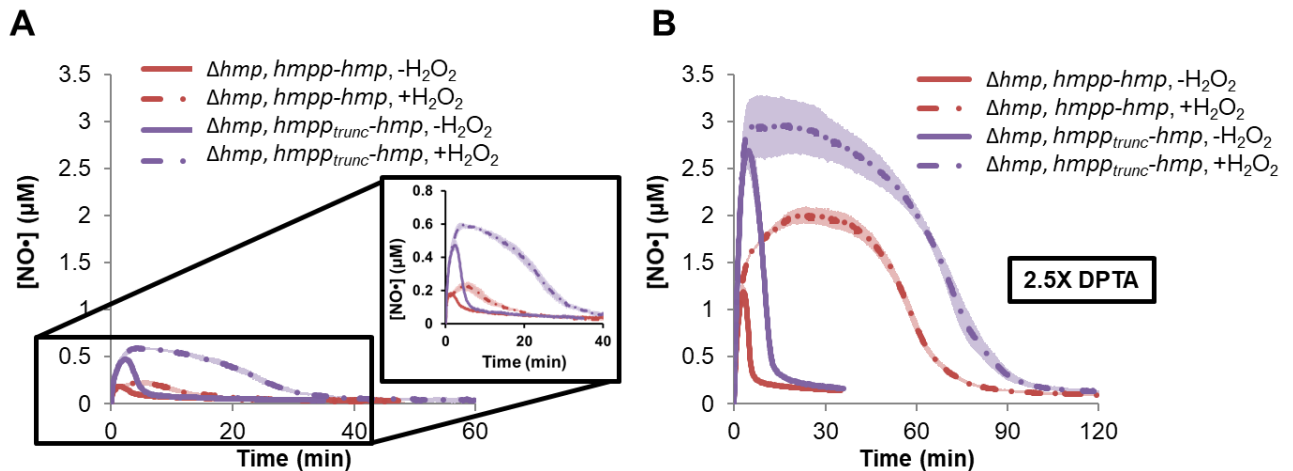

**Fig. S14. MetR binding site in *hmp* promoter is important for activation of expression.** On the *hmp* expression plasmids, MetR binding sites were either included or excluded (*hmpp<sub>trunc</sub>*) from the promoter. In the absence of MetR binding sites, H<sub>2</sub>O<sub>2</sub> still delayed NO• detoxification. Due to copy number or leakiness effects from the plasmid-borne *hmp*, cells could more readily consume NO• when 50  $\mu M$  DPTA was delivered, resulting in a comparatively low [NO•] peak and fast NO• clearance (A). When the concentration of DPTA was increased 2.5 fold to 125  $\mu M$ , the NO• concentration was closer to what was observed in wild-type cultures. The solid and dashed lines represent the averages of three independent replicates, and the shading around those lines indicates the standard errors of those means.

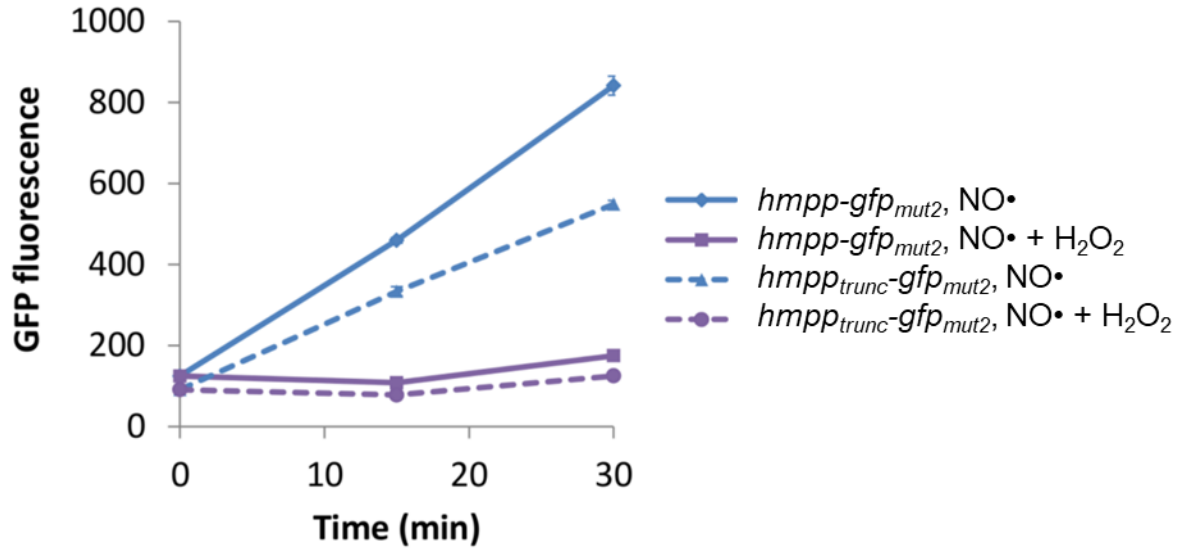

**Fig. S15. MetR is not responsible for H<sub>2</sub>O<sub>2</sub>-dependent suppression of *hmp* induction.**

Exponentially-growing  $\Delta hmp$  cells transformed with an *hmp* transcriptional reporter (pUA66 *hmpp-gfp<sub>mut2</sub>*), or an analogous reporter truncated to remove the *metR* binding site (pUA66 *hmpp<sub>trunc</sub>-gfp<sub>mut2</sub>*) were inoculated into a bioreactor containing 0 or 30  $\mu$ M H<sub>2</sub>O<sub>2</sub> in M9 media with 10 mM glucose, then immediately treated with 50  $\mu$ M DPTA. A  $\Delta hmp$  background was used to maintain identical NO• environments in the two samples. Transcription is significantly inhibited ( $p < 0.05$  at 15 and 30 min) in the presence of H<sub>2</sub>O<sub>2</sub> regardless of whether the *metR* binding site is present. However, maximal induction of transcription appears to require the *metR* site. Error bars show the standard error of the mean from three biological replicates. The asterisk (\*) represents significant difference while comparing solid to solid, and dashed to dashed lines.



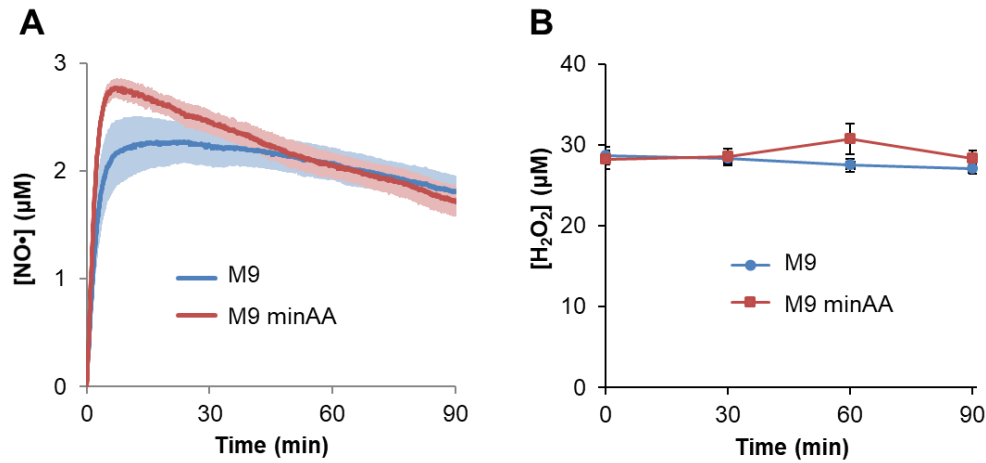

**Fig. S16. MinAA supplement does not affect dynamics of  $\text{NO}\cdot$  and  $\text{H}_2\text{O}_2$ .** 50  $\mu\text{M}$  DPTA (A) or 30  $\mu\text{M}$   $\text{H}_2\text{O}_2$  (B) was added to cell-free M9 media with 10 mM glucose (M9) or that media with minAA (M9 minAA). The inclusion of minAA in the media does not seem to cause significant changes to the dynamics of  $\text{NO}\cdot$  and stability of  $\text{H}_2\text{O}_2$ . The solid lines and dots represent the averages from three independent replicates, and the shading and error bars the standard errors of those means.

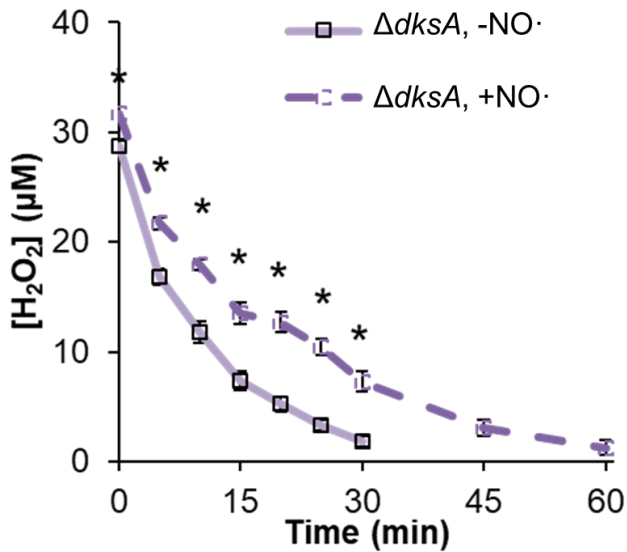

**Fig. S17. NO• delays H<sub>2</sub>O<sub>2</sub> clearance in  $\Delta dksA$ .** Exponentially-growing  $\Delta dksA$  was transferred to a bioreactor containing M9 media with 10 mM glucose and 30  $\mu$ M H<sub>2</sub>O<sub>2</sub>. Cells were then treated with either 0 or 50  $\mu$ M DPTA. The presence of NO• delays H<sub>2</sub>O<sub>2</sub> clearance in  $\Delta dksA$  by about 2-fold. The data points are the means of at least three biological replicates, and the error bars represent the standard errors. The asterisk (\*) illustrates a significant difference between H<sub>2</sub>O<sub>2</sub> concentrations at the same time point for with and without NO• samples using a p-value threshold < 0.05.

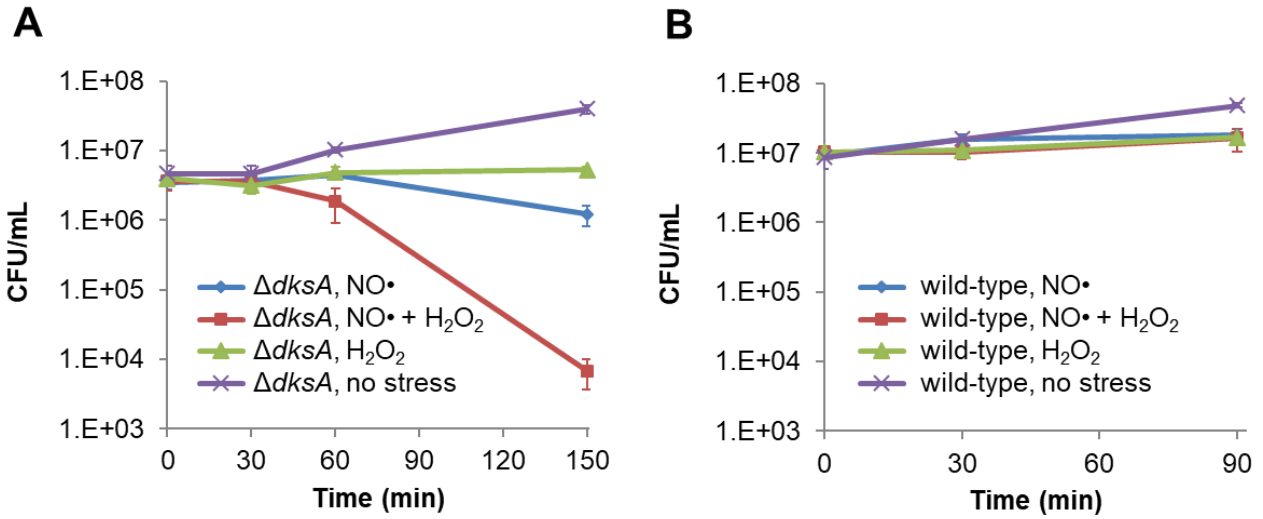

**Fig. S18. NO• causes cell death in  $\Delta dksA$ .**  $\Delta dksA$  and wild-type were grown to OD<sub>600</sub> ~ 0.2 in M9 minAA. Exponentially-growing cells were then inoculated into a bioreactor containing M9 minAA. Before H<sub>2</sub>O<sub>2</sub> and DPTA treatments, 200  $\mu$ L of culture was removed and plated on LB agar for CFU enumeration. Afterward, 0 or 30  $\mu$ M H<sub>2</sub>O<sub>2</sub> and 50  $\mu$ M DPTA or the same volume of solvent (10 mM NaOH) were added. 200  $\mu$ L of the content in bioreactor was withdrawn at indicated times following treatment and plated on LB agar overnight. The data points represent the means of 3 independent replicates, and the error bars the standard errors of those means.

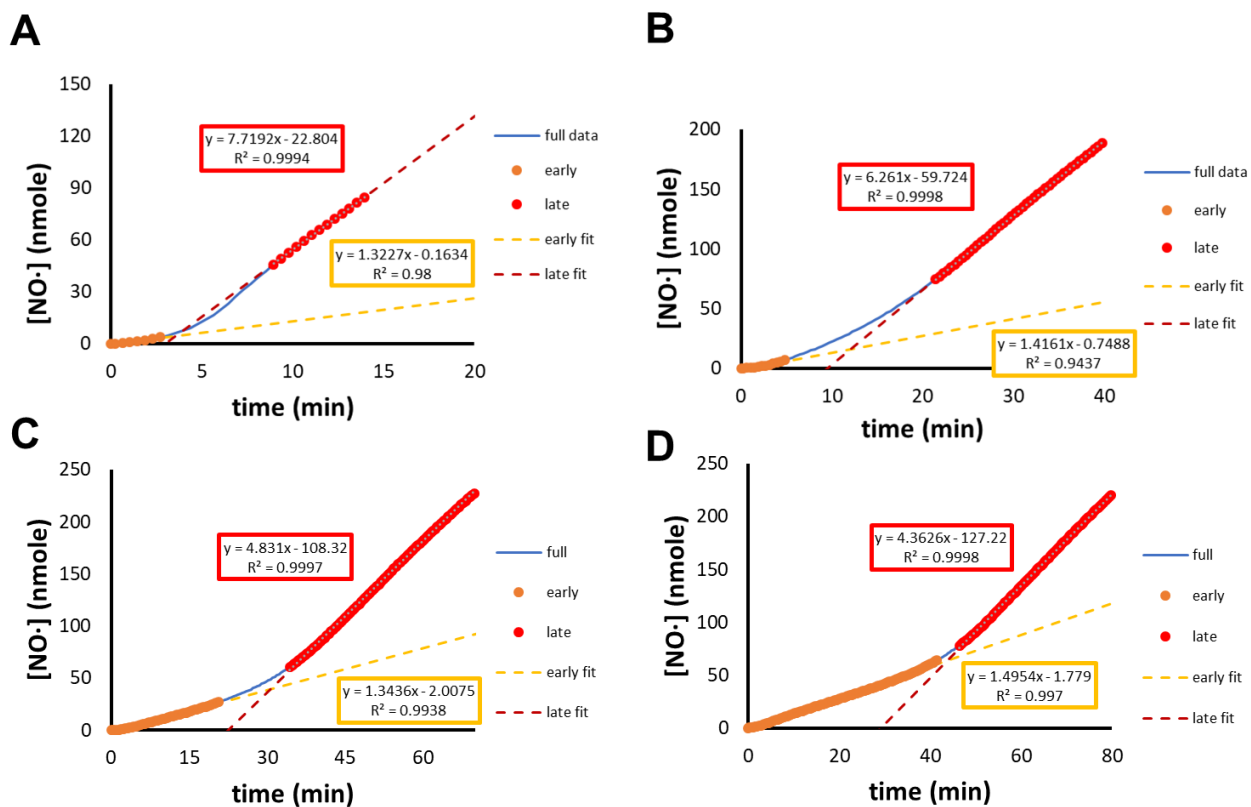

**Fig. S19. Linear fits of different regimes of  $\text{NO}\cdot$  consumption.** The rates of  $\text{NO}\cdot$  consumption under different  $\text{H}_2\text{O}_2$  conditions (0  $\mu\text{M}$  (A), 10  $\mu\text{M}$  (B), 20  $\mu\text{M}$  (C), and 30  $\mu\text{M}$  (D)) were approximated by the slopes of the linear fits for different regimes. The equation and  $R^2$  of each fit are presented in the box of the corresponding color.

**Table S1. Bacterial strain and plasmid table.** Bacterial strains and plasmids used in this study.

| <b>Strain</b>  | <b>Genotype</b>                                                    | <b>Reference</b>           |
|----------------|--------------------------------------------------------------------|----------------------------|
| MG1655         | wild-type                                                          | [1]                        |
| WCKA01         | MG1655 $\Delta nsrR::kan$                                          | This work                  |
| WCKA02         | MG1655 $\Delta nsrR::scar$                                         | This work                  |
| WCKA03         | MG1655 $\Delta hmp::kan$                                           | This work                  |
| WCKA04         | MG1655 $\Delta hmp::scar$                                          | This work                  |
| WCKA05         | MG1655 $\Delta katE::kan$                                          | This work                  |
| WCKA06         | MG1655 $\Delta katG::kan$                                          | This work                  |
| WCKA07         | MG1655 $\Delta sdsN::kan$                                          | This work                  |
| WCKA08         | MG1655 $\Delta oxyR::kan$                                          | This work                  |
| WCKA09         | MG1655 $\Delta rpoS::kan$                                          | This work                  |
| WCKA10         | MG1655 $\Delta fur::kan$                                           | This work                  |
| WCKA11         | MG1655 $\Delta fnr::kan$                                           | This work                  |
| WCKA12         | MG1655 $\Delta dksA::kan$                                          | [2]                        |
| <b>Plasmid</b> | <b>Genotype</b>                                                    | <b>Source or Reference</b> |
| pUA66          | Vector, SC101ori, <i>kan</i> , <i>gfpmut2</i> reporter             | [3]                        |
| pCP20          | Vector, <i>amp</i> , <i>flp</i>                                    | [4]                        |
| pKD46          | Vector, <i>amp</i> , <i>araC</i> , <i>araBp-exo-bet-gam</i>        | [5]                        |
| pKD4           | Vector, <i>kan</i> , <i>amp</i>                                    | [5]                        |
| pWCKA01        | pUA66 <i>T5p-Φ(hmp-gfp<sub>sr</sub>)</i> , <i>lacI<sup>q</sup></i> | [6]                        |
| pWCKA02        | pUA66 <i>hmpp-hmp</i>                                              | This work                  |
| pWCKA03        | pUA66 <i>hmpp<sub>trunc</sub>-hmp</i> (- MetR binding sites)       | This work                  |
| pWCKA04        | pUA66 <i>nsrRp-nsrR</i>                                            | This work                  |
| pWCKA05        | pUA66 <i>hmpp-gfp<sub>mut2</sub></i>                               | This work                  |
| pWCKA06        | pUA66 <i>hmpp<sub>trunc</sub>-gfp<sub>mut2</sub></i>               | This work                  |
| pWCKA07        | pUA66 <i>katGp-gfp<sub>mut2</sub></i>                              | This work                  |
| pWCKA08        | pUA66 <i>T5p-gfp<sub>sr</sub></i> , <i>lacI<sup>q</sup></i>        | [5]                        |
| pWCKA09        | pET-11a- <i>phzM</i>                                               | [5]                        |

**Table S2.1: PCR check primers**

| Deletion      | Forward external primer <sup>a,c</sup> | Reverse external primer <sup>c</sup> | Forward internal primer <sup>b</sup> | Reverse internal primer <sup>b</sup> |
|---------------|----------------------------------------|--------------------------------------|--------------------------------------|--------------------------------------|
| $\Delta nsrR$ | TTTTTCCTTCCCCG<br>AACTGA               | ATATTGTCGCCA<br>GCACTTC              | GGATTACGTGCGC<br>TGATCTA             | AAAGCGGTTGATT<br>CTCTTCAA            |
| $\Delta hmp$  | CCGAATCATTGTGC<br>GATAACA              | GCAAAATCGGTGA<br>CGGTA AAA           | TCCCTTACTGGTG<br>GAAACG              | CACGCCAGATCC<br>ACTAACT              |
| $\Delta katE$ | TATTTGCCACGCAG<br>CATCCA               | TTGAGACTGCTGA<br>CAAACGCAA           | AAAAACTCACCGG<br>ACGTGAC             | TCACCCATTCGGG<br>AGTAGAG             |
| $\Delta katG$ | ATCTCAACTATCGC<br>ATCCGTGGA            | CAGGGCAATGGCT<br>AAGGTGTATTTA        | CAACCGAGATGGG<br>TCTGATT             | CTCAACACCAACC<br>ACACCAG             |
| $\Delta sdsN$ | ATAGTAAACCGCA<br>ACGCCCC               | N/A                                  | N/A*                                 | TCGGGGCTGGACG<br>CCATTTC             |
| $\Delta oxyR$ | GTTAAAAGAGGTG<br>CCGCTCC               | N/A                                  | TTGAGTACCTGGT<br>GGCATTG             | GAAATGGCCATCC<br>ATTCTTG             |
| $\Delta rpoS$ | CCATAACGACACA<br>ATGCTGGTC             | TATCTGGGGTTGT<br>CGGTAGC             | AATGAAGATGCGG<br>AATTTGATG           | ATATTCAGCCCCT<br>GCGTTTG             |
| $\Delta fur$  | GCCAGGGACTTGTG<br>GTTTTTC              | N/A                                  | CAATACCGCCCTA<br>AAGAAAGC            | GTTCATCTTCGCG<br>GCAAT               |
| $\Delta fnr$  | TGTGCCAGCTTGTT<br>CACACTT              | N/A                                  | GATCCCGGAAAAG<br>CGAATTA             | AGGCAACGTTACG<br>CGTATGA             |

<sup>a</sup> Following P1 transduction, proper chromosomal integration of the kanamycin resistance cassette (*kan*) was checked using a forward primer external to the gene on the chromosome and the following internal *kan* reverse primer: ATGATGGATACTTTCTCGGCAGGAG.

<sup>b</sup> Potential gene duplication was checked using forward and reverse primers internal to the gene.

<sup>c</sup> After removal of the *kan* cassette, proper scar size was confirmed with forward and reverse primers external to the gene on the chromosome.

\* Due to the small size of *sdsN*, cPCR for  $\Delta sdsN$  was performed only with the forward external primer and the reverse internal primer.

**Table S2.2: qPCR primers**

| Target gene               | Forward primer        | Reverse primer       |
|---------------------------|-----------------------|----------------------|
| <i>phzM</i>               | CGGCGAAGACTTCTACAGCTA | CAGGATGGCCTTGGTCAAT  |
| <i>gfp<sub>mut2</sub></i> | GGTGATGTAAATGGGCACAA  | GGCCATGGAACAGGTAGTTT |

**Table S2.3: Plasmid construction primers**

| Function                                                                                        | Forward primer                       | Reverse primer                         |
|-------------------------------------------------------------------------------------------------|--------------------------------------|----------------------------------------|
| Copy <i>hmp<sub>p</sub>-hmp</i> from wild-type genome for pWCKA02 construction                  | GCGCATCTCGAGGAACAGT<br>ATAACCGAATCAT | GCGCGCCCTGCAGGTTAC<br>AGCACCTTATGCGGGC |
| Copy <i>hmp<sub>p<sub>trunc</sub>}-hmp</sub></i> from wild-type genome for pWCKA03 construction | GCGCGCCTCGAGTCTTTCT<br>GAAAAACACCA   | GCGCGCCCTGCAGGTTAC<br>AGCACCTTATGCGGGC |
| Copy <i>nsrR<sub>p</sub>-nsrR</i> from wild-type genome for pWCKA04 construction                | GCGCGCCTCGAGGTCGGGT<br>AAGCCATTACG   | GCGCGCCCTGCAGGTCAC<br>TCCACCAGCAAT     |

**Table S.2.4: Wanner knock-out primers**

| <b>Function</b>                                                                        | <b>Forward primer</b>                                                   | <b>Reverse primer</b>                                                    |
|----------------------------------------------------------------------------------------|-------------------------------------------------------------------------|--------------------------------------------------------------------------|
| Copy <i>kan</i> from pKD4, with homology to the upstream and downstream of <i>sdsN</i> | CAAACATCACATAAATAA<br>GATTTATATATAATTTATAT<br>TGTGTAGGCTGGAGCTGCT<br>TC | ACCCGCCAGTTCCTCGAG<br>AAGTTTCTGCTGCAATAA<br>TAAGATGGGAATTAGCCA<br>TGGTCC |

## References

1. Adolfsen, K.J. and M.P. Brynildsen, *A Kinetic Platform to Determine the Fate of Hydrogen Peroxide in Escherichia coli*. PLoS Comput Biol, 2015. **11**(11): p. e1004562.
2. Chou, W.K. and M.P. Brynildsen, *Loss of DksA leads to multi-faceted impairment of nitric oxide detoxification by Escherichia coli*. Free Radic Biol Med, 2019. **130**: p. 288-296.
3. Zaslaver, A., et al., *A comprehensive library of fluorescent transcriptional reporters for Escherichia coli*. Nat Methods, 2006. **3**(8): p. 623-8.
4. Cherepanov, P.P. and W. Wackernagel, *Gene disruption in Escherichia coli: Tc R and Km R cassettes with the option of Flp-catalyzed excision of the antibiotic-resistance determinant*. Gene, 1995. **158**: p. 9-14.
5. Datsenko, K.A. and B.L. Wanner, *One-step inactivation of chromosomal genes in Escherichia coli K-12 using PCR products*. PNAS, 2000. **97**(12): p. 6640-5.
6. Robinson, J.L. and M.P. Brynildsen, *An ensemble-guided approach identifies ClpP as a major regulator of transcript levels in nitric oxide-stressed Escherichia coli*. Metab Eng, 2015. **31**: p. 22-34.
